# Supplementary material for: Diffusion Kurtosis Imaging maps neural damage in the EAE model of multiple sclerosis
Source: PubMed Central journal article supplement — Neuroimage. Author manuscript; Available in PMC 2022 Aug 8. (PMC9358435; doi:10.1016/j.neuroimage.2019.116406), 2019-12-10
Supplement: NIHMS1546727-supplement-1.pdf [file NIHMS1546727-supplement-1.pdf]

| Tissue | Parameter         | Outliers # | $R_{GLMM(c)}^2$ | P-values vs null model | LME estimates |        |        |        |        |        |
|--------|-------------------|------------|-----------------|------------------------|---------------|--------|--------|--------|--------|--------|
|        |                   |            |                 |                        | Grade         |        |        | Lesion |        |        |
|        |                   |            |                 |                        | lower         | est    | upper  | lower  | est    | upper  |
| GM     | MD                | 4163       | 0.347           | 0.037                  | -0.008        | 0.003  | 0.014  |        |        |        |
| GM     | MKT               | 4415       | 0.194           | <0.001                 | -0.055        | -0.034 | -0.014 |        |        |        |
| WM     | $K_{\perp}$       | 5224       | 0.152           | <0.001                 | -0.153        | -0.118 | -0.082 | -0.960 | -0.854 | -0.748 |
| WM     | FA                | 8618       | 0.624           | <0.001                 | -0.026        | -0.015 | -0.003 | -0.395 | -0.340 | -0.285 |
| WM     | $K_{\parallel}$   | 4581       | 0.994           | <0.001                 | -0.037        | -0.020 | -0.002 | 0.040  | 0.077  | 0.114  |
| WM     | $D_{\perp}$       | 5258       | 0.479           | <0.001                 | 0.009         | 0.013  | 0.017  | 0.171  | 0.255  | 0.340  |
| WM     | $D_{\parallel}$   | 4240       | 0.523           | <0.001                 | -0.056        | -0.012 | 0.031  | -0.248 | -0.180 | -0.111 |
| WM     | $f$               | 5220       | 0.556           | <0.001                 | -0.012        | -0.009 | -0.006 | -0.118 | -0.097 | -0.076 |
| WM     | $D_a$             | 3532       | 0.752           | 0.0036                 | -0.022        | -0.006 | 0.011  | -0.030 | 0.142  | 0.314  |
| WM     | $D_{e,\parallel}$ | 3297       | 0.669           | <0.001                 | 0.004         | 0.009  | 0.014  | 0.031  | 0.108  | 0.185  |
| WM     | $D_{e,\perp}$     | 5576       | 0.753           | <0.001                 | -0.009        | -0.006 | -0.003 | 0.158  | 0.261  | 0.364  |
| WM     | $\kappa$          | 4764       | 0.740           | <0.001                 | -0.777        | -0.606 | -0.434 | -7.589 | -6.853 | -6.117 |
