# Supplementary material for: Diffusion Kurtosis Imaging maps neural damage in the EAE model of multiple sclerosis
Source: PubMed Central journal article supplement — Neuroimage. Author manuscript; Available in PMC 2022 Aug 8. (PMC9358435; doi:10.1016/j.neuroimage.2019.116406), 2019-12-10
Supplement: NIHMS1546727-supplement-2.pdf [file NIHMS1546727-supplement-2.pdf]

| parameter | Post-hoc groupwise ANOVA p-value in segment |       |       |       |
|-----------|---------------------------------------------|-------|-------|-------|
|           | all                                         | MTO   | LTO   | LU    |
| FA        | 0.205                                       | 0.350 | 0.530 | 0.604 |
| K_perp    | 0.673                                       | 0.742 | 0.441 | 0.527 |
| K_par     | 0.254                                       | 0.442 | 0.007 | 0.659 |
| D_perp    | 0.333                                       | 0.495 | 0.130 | 0.228 |
| D_par     | 0.419                                       | 0.333 | 0.647 | 0.136 |
| f         | 0.449                                       | 0.856 | 0.512 | 0.214 |
| D_a       | 0.353                                       | 0.890 | 0.527 | 0.232 |
| D_e_par   | 0.864                                       | 0.998 | 0.101 | 0.817 |
| D_e_perp  | 0.184                                       | 0.133 | 0.177 | 0.072 |
| kappa     | 0.615                                       | 0.876 | 0.951 | 0.762 |
