# Supplementary material for: Diffusion Kurtosis Imaging maps neural damage in the EAE model of multiple sclerosis
Source: PubMed Central journal article supplement — Neuroimage. Author manuscript; Available in PMC 2022 Aug 8. (PMC9358435; doi:10.1016/j.neuroimage.2019.116406), 2019-12-10
Supplement: NIHMS1546727-supplement-3.pdf [file NIHMS1546727-supplement-3.pdf]

| Parameter | Grade | Segment             | Segment:Grade |
|-----------|-------|---------------------|---------------|
| FA        | 0.205 | 0.530               | 0.604         |
| K_par     | 0.254 | <b><u>0.007</u></b> | 0.659         |
| K_perp    | 0.673 | 0.442               | 0.527         |
| D_par     | 0.419 | 0.647               | 0.136         |
| D_perp    | 0.333 | 0.130               | 0.228         |
| f         | 0.449 | 0.512               | 0.214         |
| D_a       | 0.353 | 0.527               | 0.232         |
| D_e_par   | 0.864 | 0.101               | 0.817         |
| D_e_pepr  | 0.184 | 0.177               | 0.072         |
| kappa     | 0.615 | 0.951               | 0.762         |

Significant in:  
**Low-high**  
low-intermed
