# Supplementary material for: Diffusion Kurtosis Imaging maps neural damage in the EAE model of multiple sclerosis
Source: PubMed Central journal article supplement — Neuroimage. Author manuscript; Available in PMC 2022 Aug 8. (PMC9358435; doi:10.1016/j.neuroimage.2019.116406), 2019-12-10

NAWM  $D_{e,\parallel}$

Mid-thoracic

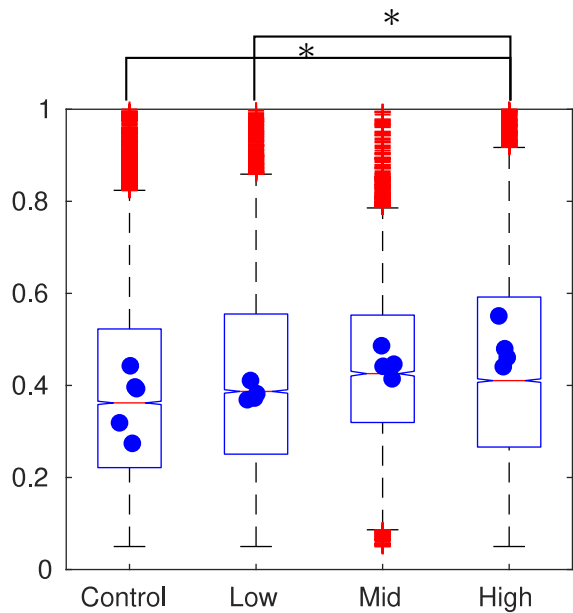

Low-thoracic

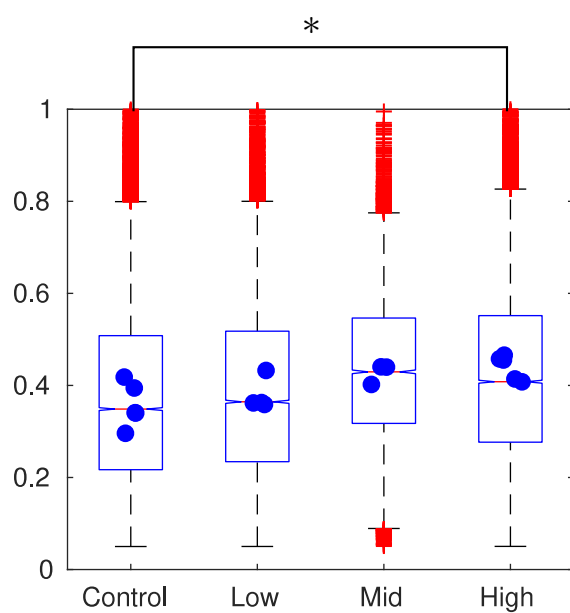

Lumbar

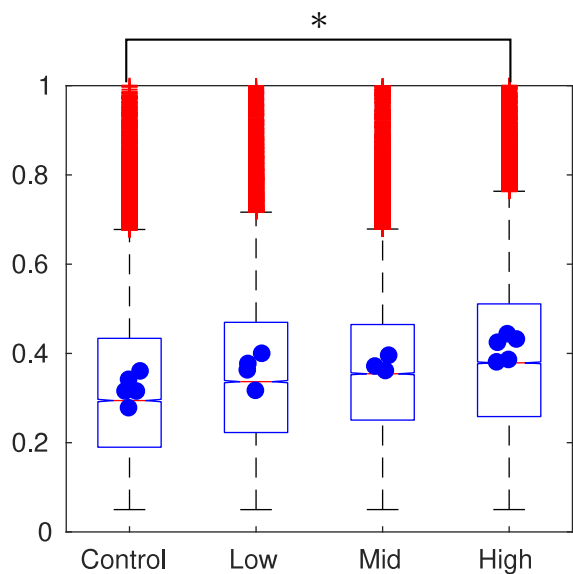

\* all

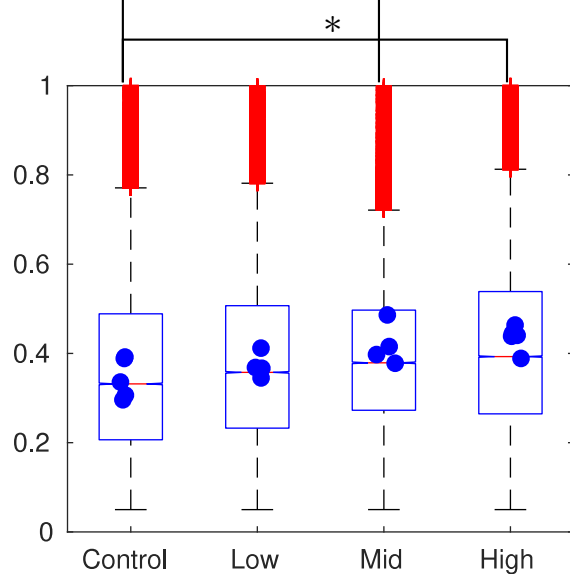

$D_{e,\parallel}$  in and outside lesions

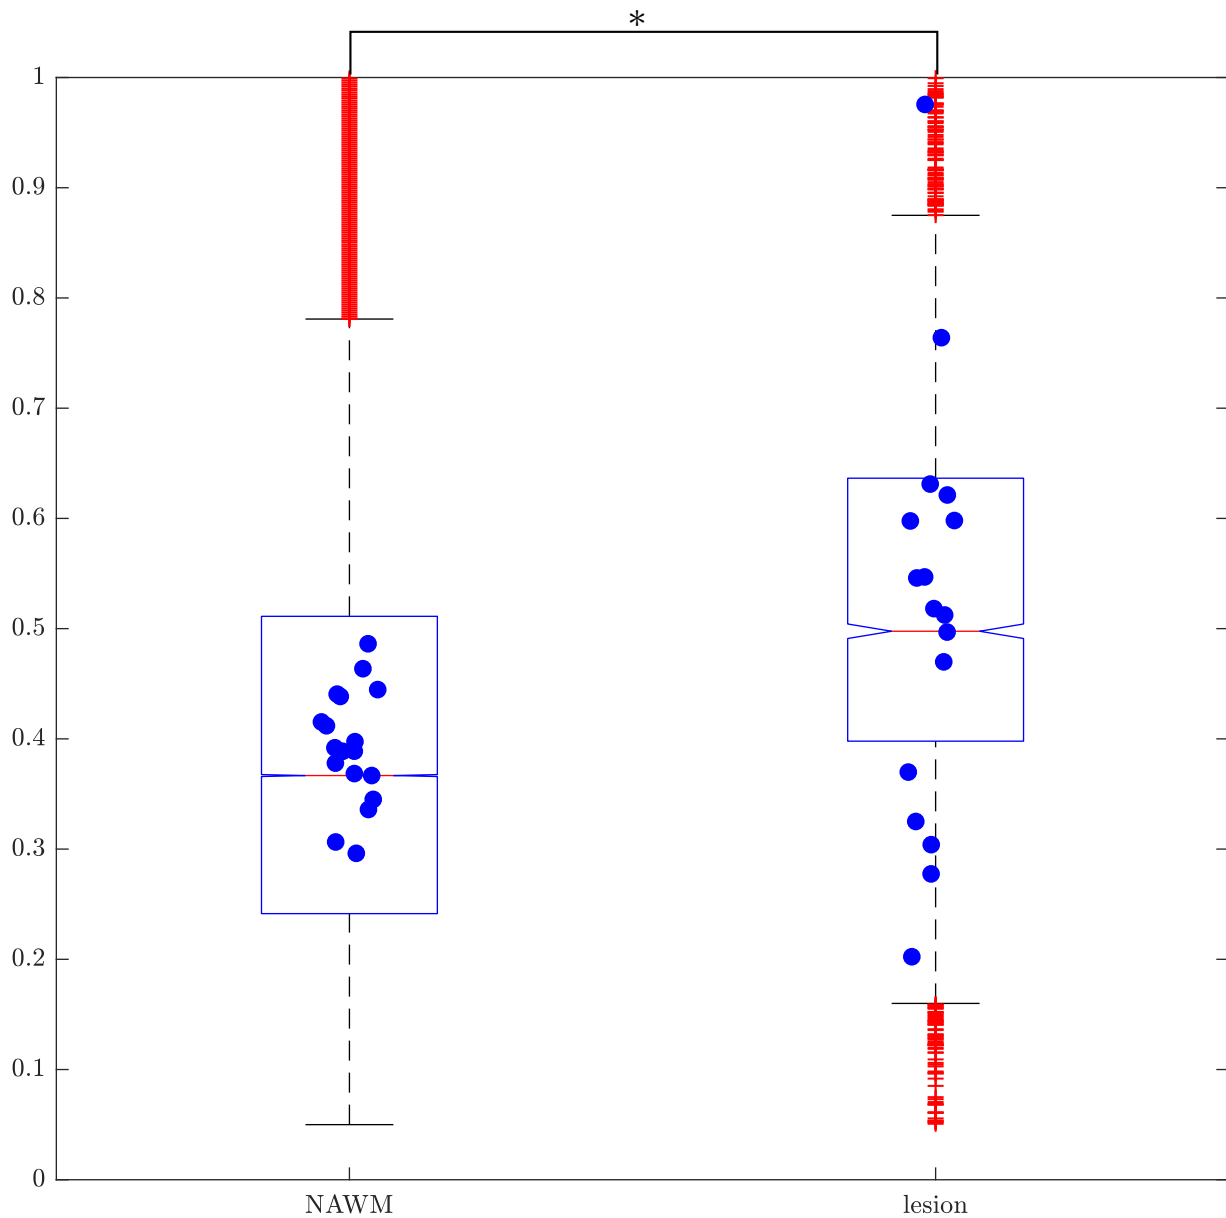

NAWM  $f$ 

Mid-thoracic

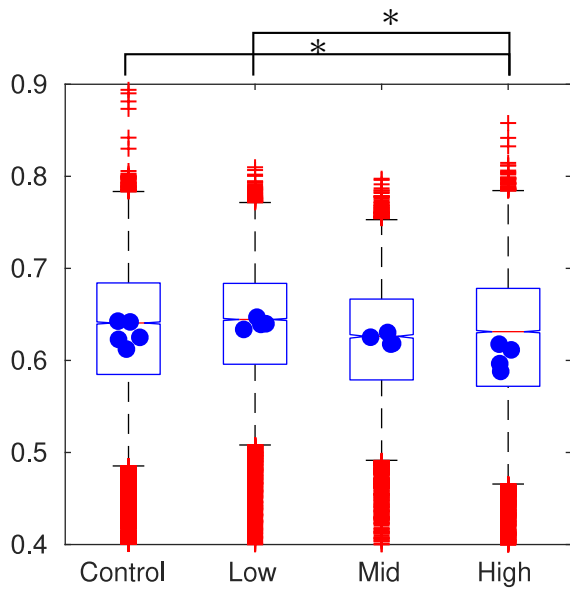

Low-thoracic

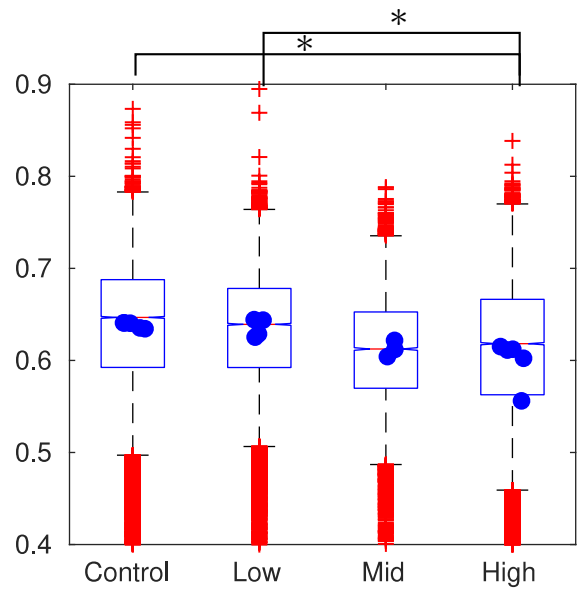

Lumbar

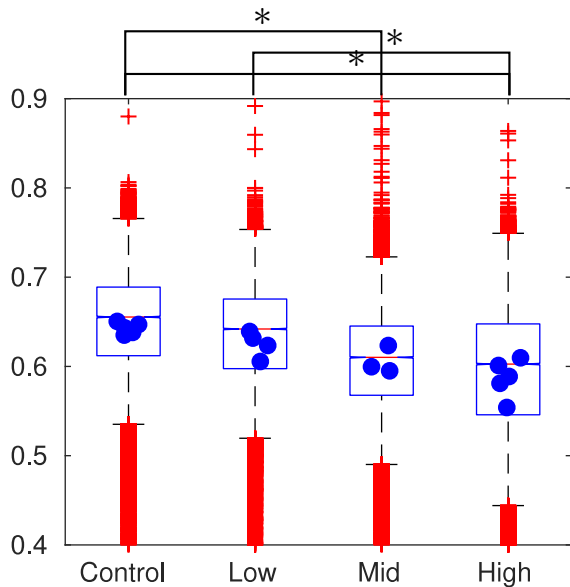

all

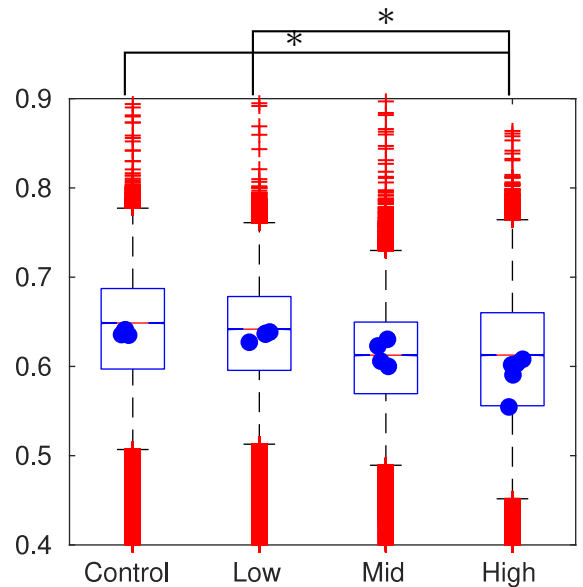

$f$  in and outside lesions

\*

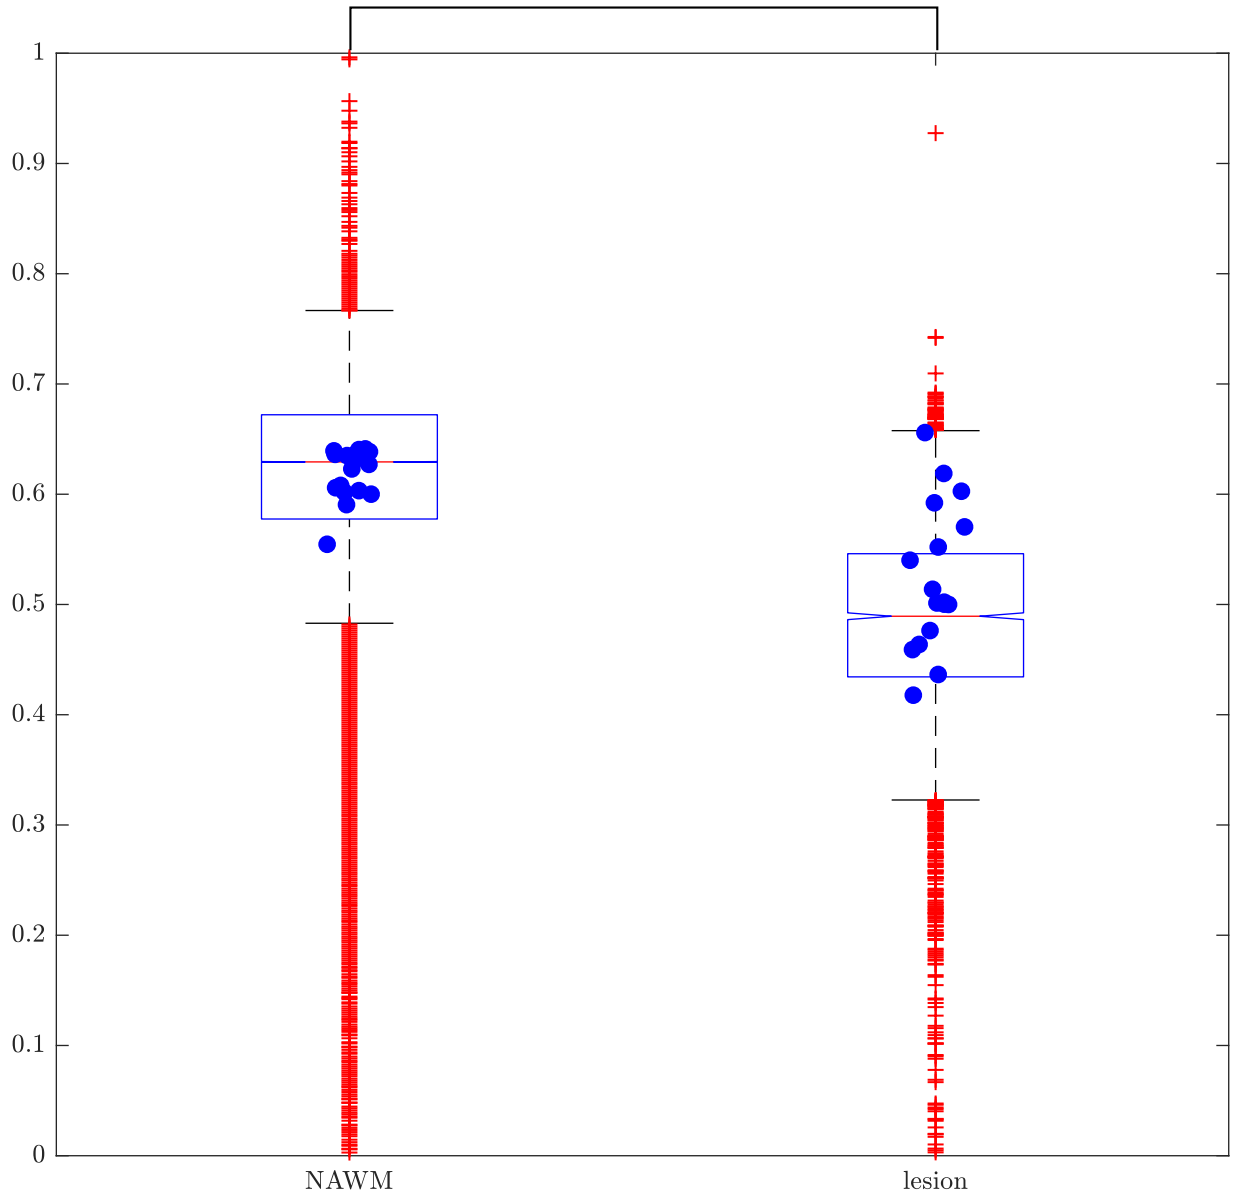

Supplement: NIHMS1546727-supplement-4.pdf [file NIHMS1546727-supplement-4.pdf]
