# Supplementary material for: Diffusion Kurtosis Imaging maps neural damage in the EAE model of multiple sclerosis
Source: PubMed Central journal article supplement — Neuroimage. Author manuscript; Available in PMC 2022 Aug 8. (PMC9358435; doi:10.1016/j.neuroimage.2019.116406), 2019-12-10
Supplement: NIHMS1546727-supplement-5.pdf [file NIHMS1546727-supplement-5.pdf]

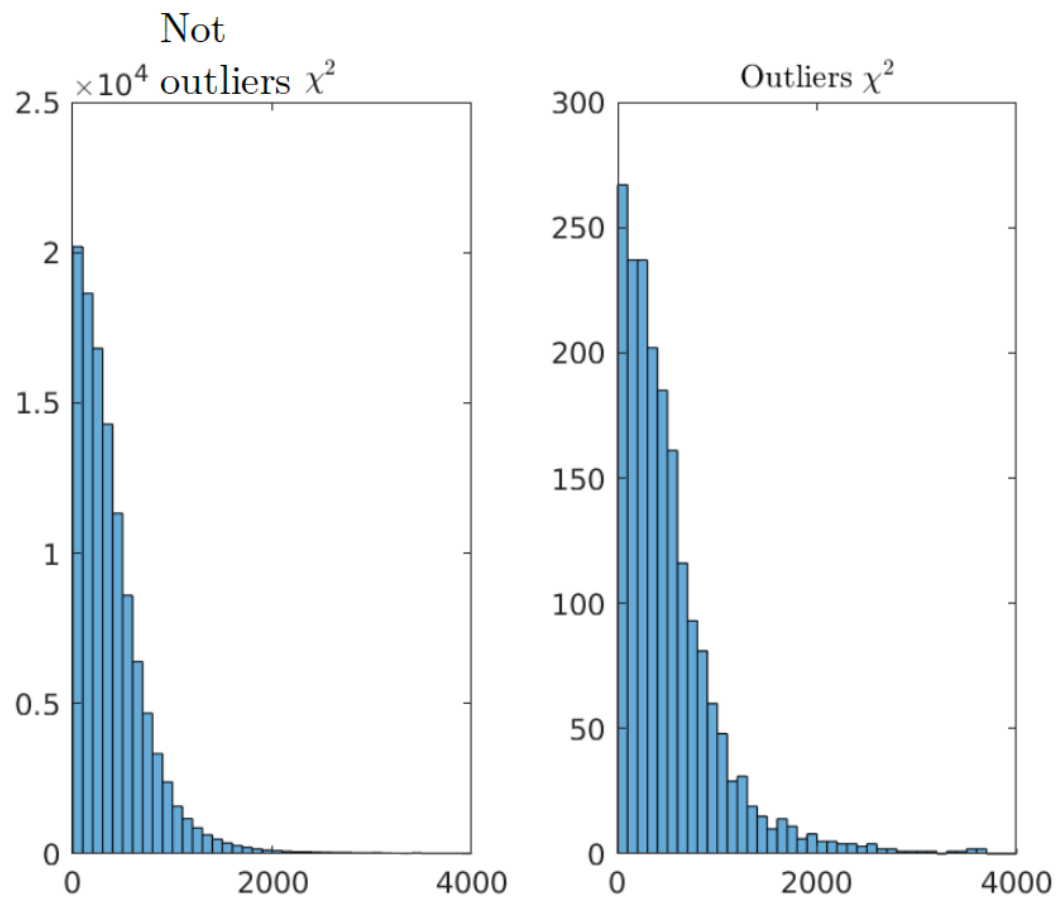

Figure 1: : Examples of histograms of quality of fit of the outliers excluded from the LME fit (on the right), and the rest of the voxels (on the left).
