# Supplementary material for: Diffusion Kurtosis Imaging maps neural damage in the EAE model of multiple sclerosis
Source: PubMed Central journal article supplement — Neuroimage. Author manuscript; Available in PMC 2022 Aug 8. (PMC9358435; doi:10.1016/j.neuroimage.2019.116406), 2019-12-10
Supplement: NIHMS1546727-supplement-6.pdf [file NIHMS1546727-supplement-6.pdf]

| FA     | $K_{\parallel}$ | $K_{\perp}$ | $D_{\parallel}$ | $D_{\perp}$ | $f$    | $D_a$  | $D_{e,\parallel}$ | $D_{e,\perp}$ | $\kappa$ |
|--------|-----------------|-------------|-----------------|-------------|--------|--------|-------------------|---------------|----------|
| <0.001 | 0.001           | <0.001      | <0.001          | <0.001      | <0.001 | 0.0497 | 0.012             | <0.001        | <0.001   |

Table: Post-hoc analysis of NAWM against lesion tissue. For each WM parameter (in columns) we present the p-values that characterize the significance of difference in per-sample parameter mean inside against outside the lesion.
